# Supplementary material for: A set of pedagogical recommendations for improving the integrated approach to childhood overweight and obesity: A Delphi study
Source: PLoS One. 2020 Apr 27;15(4):e0231245. doi: 10.1371/journal.pone.0231245 (PMC7185684; doi:10.1371/journal.pone.0231245)
Supplement: S1 Data — (XLS) [file pone.0231245.s005.xls]

## Sheet: Blad1
Questionnaire round 1
Panelist	Numbering round 1	1	2	3	4	5	6	7	8	9	10	11	12	13	14	15	16	17	18	19	20	21	22	23	24	25	26	27		MEDIAN	MEAN	>+ 80% top tertile
Question 1
Are you familiar with the SO that BOFT factors? Choose yes or no.	Yes/no	Yes	Yes	No	Yes	No	Yes	No	?	Yes	No	Yes	Yes	Yes	Yes	Yes	No	No	Yes	Yes	No	Yes	Yes	Yes	Yes	Yes	No	Yes
Question 2
For each SO that BOFT factor can you indicate to what extent you agree with the effectiveness of this factor for the prevention of overweight in children? You can indicate this on a scale from 1 to 9. Here 1 means that you completely disagree and 9 that you completely agree with the effectiveness of this factor. You can also explain the choice of your answer in the comments field.
	Encouraging adequate and regular sleep	7	7	8	7	8	8	7	8	9	5.5	6	9	7	8	7	5	7	6	6	9	8	8	5	9	7	6	6		7	7.16667	No
	Stimulate competent parenting styles	7	9	9	8	9	9	6	8	9	7	6	9	7	9	8	6	9	9	9	9	9	8	6	9	9	5	8		9	8	Yes
	Promoting being physical active and playing outside daily	5	9	7	9	8	9	6	9	9	8	7	8	7	8	8	9	9	9	9	9	9	8	8	9	9	9	8		9	8.22222	Yes
	Eat breakfast daily	9	9	8	8	8	9	8	9	9	7	8	9	8		9	8	9	9	9	9	9	8	6	9	9	9	7		9	8.42308	Yes
	Fresh water from the tap, leave soft drinks and other sugar-sweetened drinks	6	9	9	9	9	9	8	8	9	9	9	9	8		9	9	9	9	9	9	7	9	6	9	9	9	9		9	8.57692	Yes
	Tv and computer? Say more often: NO.	7	9	7	8	5	9	8	8	9	9	7	8	7	7	8	9	9	7	7	9	8	9	7	9	9	7	7		8	7.88889	Yes
Question 3
Are you familiar with the NHG patient letter: "Overweight in children"? Choose yes or no. In addition, you can explain the choice for your answer in the comments field if necessary.	Yes/no	No	Yes	No	No	Yes	No	No	No	No	No	Yes	No	Yes	Yes	No	No	No	No	No	Yes	No	Yes	Yes	No	Yes	Nee	Yes
Question 4
For the advice to parents associated with the "SO that BOFT factors" and the "NHG patient letter:" Overweight in children ", can you indicate to what extent you think these recommendations are effective in preventing overweight in children? You can indicate this on a scale from 1 to 9. Here 1 means that you completely disagree and 9 that you completely agree with the effectiveness of this factor.…
	Encourage at least 10 hours of sleep per night		7	4	7	8	8	8	8	9	6	4	9	7		7	5	7	5	5	8	7	9	4	9	8	3	5		7	6.68	No
	Clear rules and agreements with your child and at the same time give love and warmth.		9	6	8	9	9	8	9	3	7	6	9	7	9	9	6	9	9	9	9	9	9	6	9	9	7	8		9	7.96154	Yes
	Parents be physical active yourself, so that children have an good example.	7	9	7	8	8	9	7	8	9	9	8	9	8	8	8	7	9	9	9	9	9	9	5	9	9	8	8		8	8.22222	Yes
	Less car use.	5	9	5	8	7	5	7	8	9	7	8	6	7	5	8	8	9	6	6	9	9	8	3	9	8	8	8		8	7.22222	No
	> 1 hour / day of cycling, walking or exercising.	7	9	5	9	5	9	7	8	9	9	7	8	8	8	8	9	7	9	9	9	8	9	8	9	9	7	8		8	8.03704	Yes
	Swimming, cycling or walking with children.	6	9	4	8	6	9	6	8	9	9	8	9	8	7	9	9	9	9	9	9	8	9	5	9	9	8	8		9	8	Yes
	Breakfast preferably in a family context.	9	7	4	9	8	9	8	9	9	7	8	9	8		9	7	9	6	6	9	9	9	3	9	8	5	7		8	7.69231	Yes
	Offer a healthy breakfast.	9	8	6	8	8	9	8	8	9	8	8	9	8		8	8	9	8	8	9	9	9	4	9	7	8	8		8	8.07692	Yes
	No TV watching during	9	7	5	7	5	7	7	9	9	9	8	9	7		8	9	9	9	9	9	8	9	3	9	9	8	8		8.5	7.88462	Yes
	Do not buy sugar-sweetened drinks.	5	9	4	7	9	9	6	8	9	9	8	9	8		9	9	9	5	5	9	8	9	5	9	8	5	7		8	7.57692	No
	No or a maximum of 1 glass of sugar-sweetened soft drinks per day.	5	9	8	8	9	8	7	8	9	9	8	7	8		6	9	9	9	9	9	8	9	6	9	3	3	8		8	7.69231	Yes
	Children drink water, tea or fruit juice mixed with water.	5	9	6	8	7	9	8	8	9	9	9	9	8		8	9	8	8	8	9	8	9	7	9	9	7	8		8	8.11538	Yes
	Children do not watch TV and / or computers for more than 2 hours a day.	5	9	7	8	6	9	7	8	9	9	4	8	8	8	7	9	8	6	6	9	8	9	7	9	9	8	7		8	7.66667	Yes
	Never watch TV or use a computer for longer than being physical active.	7	9	5	8	6	9	7	8	9	9	7	7	7	3	8	9	8	6	6	9	9	8	6	9	6	9	9		8	7.51852	No
	No TV in the children's bedroom.	9	7	5	7	9	7	8	8	9	7	8	9	7	4	4	6	9	6	6	9	9	9	8	9	9	7	9		8	7.55556	No
	Make arrangements with your child to ensure that he or she does not sit in front of the computer- or TV-screen for too long.	9	9	6	8	6	9	7	9	9	8	8	9	7	8	8	9	9	9	9	9	9	9	6	9	9	6	8		9	8.18519	Yes
	Make sure your child plays outside regularly, goes shopping on a bicycle or walks the dog.	9	9	5	8	7	9	7	9	9	8	8	9	7	7	8	9	9	9	9	9	8	9	3	9	8	9	7		9	8.03704	Yes
	A child must be physical active for at least an hour every day. Don't force it but join in and make it fun. Also ask friends, brothers or sisters to participate.	5	9	5	8	7	9	6	8	9	9	4	9	8	9	8	9	7	9	9	9	8	9	8	9	9	8	7		8	7.92593	Yes
	Make your child a member of a sports club and regularly watch training sessions or competitions to stimulate it.	9	7	5	7	7	9	6	8	9	6	4	9	7	7	8	7	9	3	3	9	9	8	5	9	6	8	7		7	7.07407	No
	If your child has achieved swimming diploma A, have your child pass for diploma B and C.	9	6	5	6	5	5	6	6	9	6	2	7	3	5	8	4	9	6	6	9	8	8	3	9	7	8	6		6	6.33333	No
	Undertake physical activities that you can do with the whole family, such as a forest walk, a beach walk or a bike ride together or swimming together at the weekend.	9	8	4	8	6	9	8	8	9	9	7	9	7	7	8	8	9	8	8	9	8	9	3	9	9	9	5		8	7.77778	No
	Walk to school together, take the bicycle more often instead of the tram, bus or car.	9	9	4	8	6	5	7	6	9	9	9	9	7	8	8	8	9	9	9	9	9	8	5	9	9	9	5		9	7.81481	Yes
	Every little bit of being physical active helps. The foods that your child receives are then consumed better. Your child gets more and more muscle and less fat. It gets out of breath less quickly and feels fitter.	9	9	5	7	6	9	7	8	9	9	8	5	6	6	8	9	9	8	8	9	9	8	3	9	8	9	5		8	7.59259	No
	Ensure variety in diet. Vegetable, fruit and whole grain products contain many valuable nutrients and few calories. They give a feeling of fullness, which means your child is less likely to eat too much.	9	8	5	8	8	9	8	8	9	7	9	9	8		8	9	9	9	9	9	9	9	4	9	7	8	6		8.5	8.07692	Yes
	Choose lean meat and low-fat or semi-skimmed milk products.	9	9	5	7	7	8	8	7	9	8	6	9	8		7	9	6	9	9	9	9	8	2	9	9	8	7		8	7.73077	Yes
	Use low fat when cooking.	9	9	5	7	7	9	8	7	9	7	7	5	7		7	9	9	9	9	9	9	6	2	9	9	8	7		8	7.61538	Yes
	Drinking about one liter a day is important: in addition to milk, especially water or tea without sugar, and sometimes also fresh juice.	9	9	7	7	8	9	7	7	9	6	7	9	7		7	9	9	9	9	9	9	6	5	9	9	6	7		8.5	7.84615	Yes
	By eating a healthy and varied diet your child will get all the nutrients it needs.	9	9	5	7	8	9	8	8	9	5	6	8	8		9	7	9	6	6	9	9	9	2	9	9	7	7		8	7.57692	No
	Vitamin pills are not required.	9	7		5	5	9	6	8	3	5	8	8			9	3	9	6	6	9	9	8	1	9	8	9	3		8	6.75	No
	You can enter the age and gender of your child on the Nutrition Center website. Then you will get an overview of what your child can eat best each day.	9	8	7	6	4	9	5	8	8		8	9	8		7	9	7	9	9	9	9	8	2	9	7	8	5		8	7.48	Yes
	Eat at set times.	9	8	7	7	5	9	8	8	9	8	8	9	7		8	8	7	6	6	9	9	9	4	9	7	8	7		8	7.65385	Yes
	Do not skip breakfast.	9	9	8	8	8	9	8	9	9	8	8	9	7		9	8	9	9	9	9	9	9	4	9	9	8	7		9	8.34615	Yes
	Three meals a day is fine. Give a healthy snack at most four times a day for example: fruit, wholemeal biscuit, breadstick or rice cake, a box of raisins, cucumber or carrots. Give as litte soft drinks, candy or chips as possible.	5	9	6	8	8	9	8	6	9	7	8	9	7		8	8	9	9	9	9	8	9	4	9	9	8	7		8	7.88462	Yes
	Only allow your child to eat sweets at parties or at the weekend, and then only a little.	9	9	5	7	8	5	7	6	9	6	4	9	7		8	8	9	7	7	9	8	6	1	9	5	8	5		7	6.96154	No
	Give the right example yourself. Participate in a regularity and healthy diet.	9	9	5	8	8	9	7	8	9	8	9	9	8		9	9	9	9	9	9	9	9	5	9	9	8	5		9	8.23077	Yes
	Do not use food as a sweetener to distract, comfort or reward your child.	9	9	8	8	9	9	7	9	9	8	8	9	7	8	8	7	9	9	9	9	9	9	3	9	9	5	8		9	8.14815	Yes
	Give your child attention, listen to what it has to say, give it an extra hug or read a book together. If a child gets the right attention, it has less need to eat.	9	7	8	8	7	9	7	9	9	5	8	9	7		9	6	9	8	8	9	9	9	2	9	8	9	8		8	7.88462	Yes
Question 5
As already mentioned in the introduction, as an expert you can also have advice and guidelines in your own professional group, or you can have your own ideas about the pedagogical message to parents to prevent being overweight in children between 4 and 13 years old. These ideas need neither scientific basis nor support from other experts. What advice, from other organizations or yourself, do you …
Question 6
If you look at the aforementioned factors, guidelines and advice to parents, are there (still) general pedagogical advice that helps parents in the daily situation to get their child to eat healthier and to exercise sufficiently? This therefore concerns general upbringing (general parenting): the extent to which parents make clear agreements with their child, set rules, support, reward and punish.
